# Supplementary material
Source: PubMed Central journal article supplement (PMC1088752)
Supplement: PB011381s01.pdf [file PB011381s01.pdf]

**Appendix to Proc. R. Soc. Lond. B (ISSN 0962 8452): No. 1474, pp. 1381–1386, July 7 2001**

This is an electronic appendix to the paper by Kingston *et al* 2001 (Acoustic divergence in two cryptic species of *Hipposideros*). *Proc. R. Soc. Lond. B* **268**, 1381–1386.

Electronic appendices are refereed with the text. However, no attempt has been made to impose a uniform editorial style on the electronic appendices.

Appendix A. Variables measured for the two phonic types of *Hipposideros bicolor* and results of *t*-tests on differences between phonic types. (In each *t*-test \*  $p < 0.05$ , \*\*  $p < 0.01$ , \*\*\*  $p < 0.001$ ).

|                                  | 131-kHz <i>H. bicolor</i>                   | 142-kHz <i>H. bicolor</i>                   |                 |
|----------------------------------|---------------------------------------------|---------------------------------------------|-----------------|
|                                  | mean $\pm$ s.d. (n)                         | mean $\pm$ s.d. (n)                         |                 |
|                                  | (range)                                     | (range)                                     | <i>t</i> (d.f.) |
| Call frequency (kHz)             | 130.89 $\pm$ 1.56 (20)<br>(128.0-134.0)     | 141.80 $\pm$ 1.09 (33)<br>(138.9 - 144.5)   | 26.90 (29)***   |
| Forearm length (m)               | 0.0455 $\pm$ 0.0010 (20)<br>(0.0439-0.0472) | 0.0434 $\pm$ 0.0008 (33)<br>(0.0413-0.0451) | 8.04 (51)***    |
| Hindfoot length (m)              | 0.0070 (3)<br>(0.007-0.007)                 | 0.0068 $\pm$ 0.0005 (8)<br>(0.0060-0.0070)  | 1.53 (7)        |
| Ear length (m)                   | 0.0176 $\pm$ 0.0006 (10)<br>(0.0170-0.0185) | 0.0179 $\pm$ 0.0007 (18)<br>(0.0170-0.0190) | 1.47 (26)       |
| Tail length (m)                  | 0.0288 $\pm$ 0.0018 (6)<br>(0.026-0.031)    | 0.0276 $\pm$ 0.0023 (14)<br>(0.0240-0.032)  | 1.04 (17)       |
| Body mass (kg)                   | 0.0081 $\pm$ 0.0006 (20)<br>(0.0070-0.0090) | 0.0080 $\pm$ 0.0008 (31)<br>(0.0065-0.0095) | 0.84 (49)       |
| Wingspan (m)                     | 0.2756 $\pm$ 0.0113 (8)<br>(0.2580-0.2940)  | 0.2678 $\pm$ 0.0103 (12)<br>(0.2500-0.2860) | 1.59 (18)       |
| Hand-wing area (m <sup>2</sup> ) | 0.0025 $\pm$ 0.0001 (8)<br>(0.0024-0.0027)  | 0.0023 $\pm$ 0.0002 (12)<br>(0.0020-0.0026) | 3.25 (18)**     |

**Appendix to Proc. R. Soc. Lond. B (ISSN 0962 8452): No. 1474, pp. 1381–1386, July 7 2001**

|                                      |                                        |                                         |                 |
|--------------------------------------|----------------------------------------|-----------------------------------------|-----------------|
| Arm-wing area (m <sup>2</sup> )      | 0.0034 ± 0.0004 (8)<br>(0.0028-0.0037) | 0.0030 ± 0.0002 (12)<br>(0.0028-0.0036) | 3.15 (18)**     |
| Body and tail area (m <sup>2</sup> ) | 0.0011 ± 0.0001(8)<br>(0.0009-0.012)   | 0.0010 ± 0.0001 (12)<br>(0.0008-0.0012) | 1.34 (18)       |
| Wing area (m <sup>2</sup> )          | 0.0140 ± 0.0009 (8)<br>(0.0124-0.0150) | 0.0126 ± 0.0008 (12)<br>(0.0116-0.0146) | 3.67 (18)**     |
|                                      | 131-kHz <i>H. bicolor</i>              | 142-kHz <i>H. bicolor</i>               |                 |
|                                      | mean ± s.d. (n)                        | mean ± s.d (n)                          |                 |
|                                      | (range)                                | (range)                                 | <i>t</i> (d.f.) |
| Aspect ratio                         | 5.45 ± 0.24 (8)<br>(5.07-5.94)         | 5.72 ± 0.31 (12)<br>(5.04-6.33)         | 2.09 (18)*      |
| Wing loading (Mg/Nm <sup>-2</sup> )  | 5.63 ± 0.37 (8)<br>(5.06-6.23)         | 6.46 ± 0.79 (12)<br>(5.29-7.53)         | 2.76 (18)*      |
| Arm-wing length (m)                  | 0.0578 ± 0.0039 (8)<br>(0.0520-0.0640) | 0.0551 ± 0.0041 (12)<br>(0.0480-0.0620) | 1.44 (18)       |
| Hand-wing length (m)                 | 0.0654 ± 0.0027 (8)<br>(0.0610-0.0690) | 0.0622 ± 0.0021 (12)<br>(0.0590-0.0650) | 2.94 (18)**     |
| Tip length index, TL                 | 1.138 ± 0.103 (8)<br>(1.000-1.320)     | 1.135 ± 0.084 (12)<br>(1.048-1.329)     | 0.03 (18)       |
| Tip area index, TS                   | 0.742 ± 0.077 (8)<br>(0.658-0.875)     | 0.766 ± 0.056 (12)<br>(0.680-0.866)     | 0.87 (18)       |
| Tip shape index, I                   | 1.971 ± 0.568 (8)<br>(1.360-3.110)     | 2.183 ± 0.604 (12)<br>(1.540-3.350)     | 0.86 (18)       |
